# Supplementary material for: Quadrupolar, emission-tunable π-expanded 1,4-dihydropyrrolo[3,2-b]pyrroles – synthesis and optical properties
Source: Royal Society of Chemistry journal article supplement (doi:10.1039/c4ob00143e), 2014-01-01

## Supporting information

### Table of Contents

|                                                    |    |
|----------------------------------------------------|----|
| 1. Absorption and normalized fluorescence spectra. | S2 |
| 2. Experimental section.                           | S2 |
| 3. $^1\text{H}$ and $^{13}\text{C}$ NMR spectra.   | S3 |



## 1. Absorption and normalized fluorescence spectra.

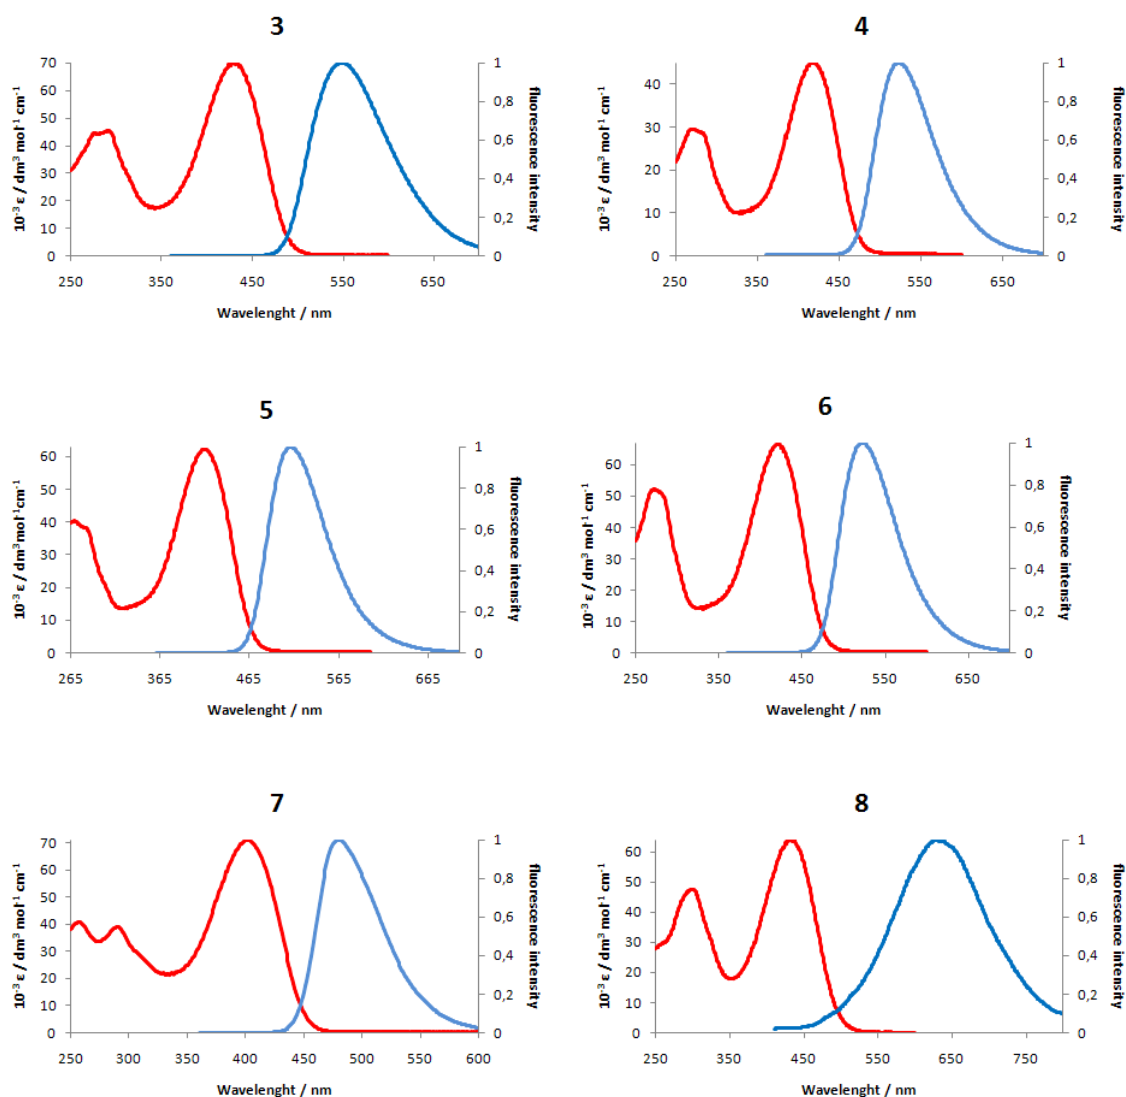

## 2. Experimental section.

All chemicals were used as received unless otherwise noted. Reagent grade solvents ( $\text{CH}_2\text{Cl}_2$ , hexanes) were distilled prior to use. All reported  $^1\text{H}$  NMR spectra were collected using a 500 MHz spectrometer. Chemical shifts ( $\delta$  ppm) were determined with TMS as the internal reference;  $J$  values are given in Hz. The UV/Vis absorption spectra were recorded in  $\text{CH}_2\text{Cl}_2$ . The absorption wavelengths are reported in nm with the extinction coefficient in  $\text{M}^{-1}\text{cm}^{-1}$  in brackets. Purge gas is high purity argon. Dry column vacuum chromatography (DCVC) was performed on preparative thin-layer chromatography silica (Silica gel 60 PF<sub>254</sub>). Melting points were determined using a capillary type apparatus. For the determination of quantum yields, quinine sulfate in 0.5 M  $\text{H}_2\text{SO}_4$  was used as a standard. The mass spectra were obtained via electron impact MS (EI-MS).

## 3. $^1\text{H}$ and $^{13}\text{C}$ NMR spectra



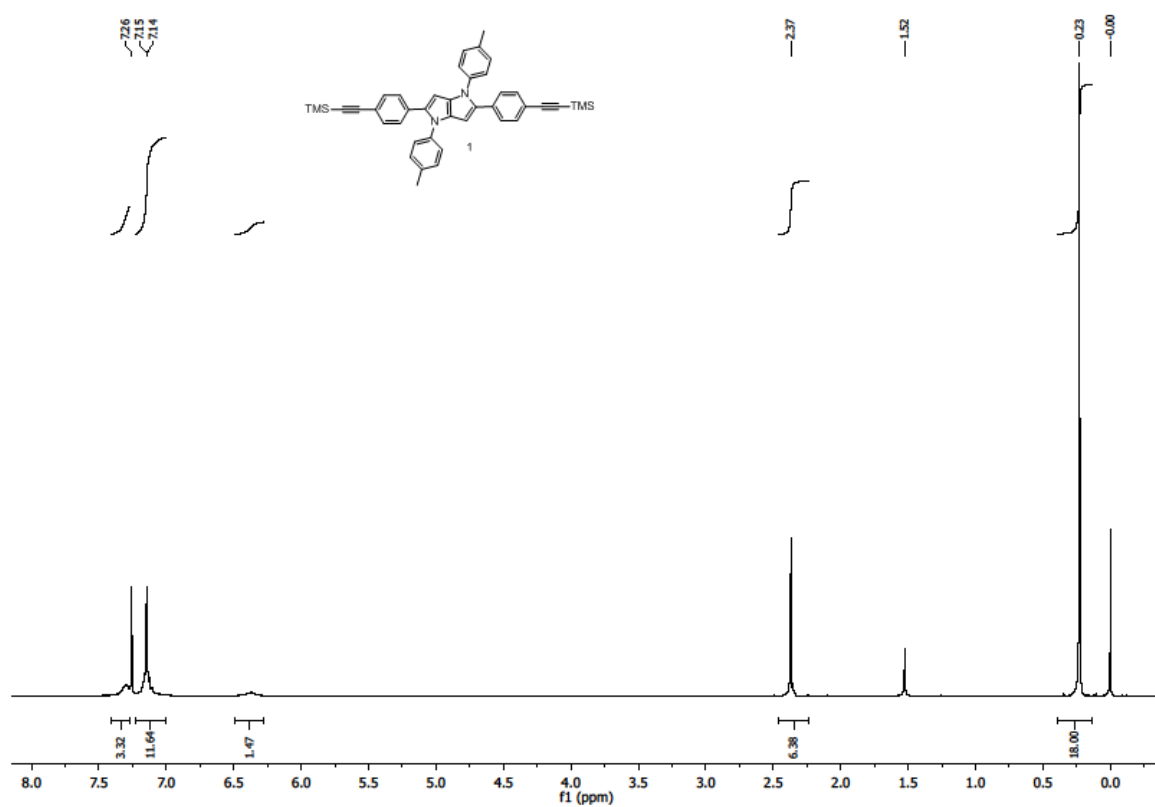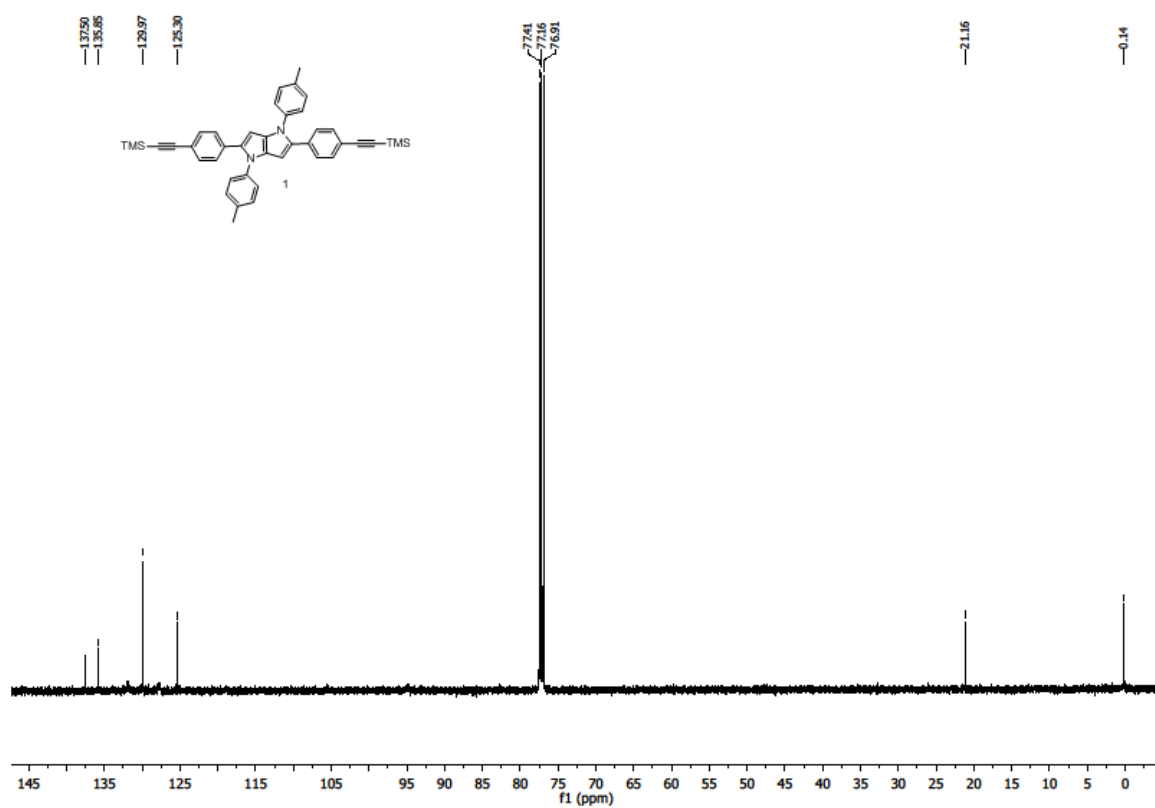



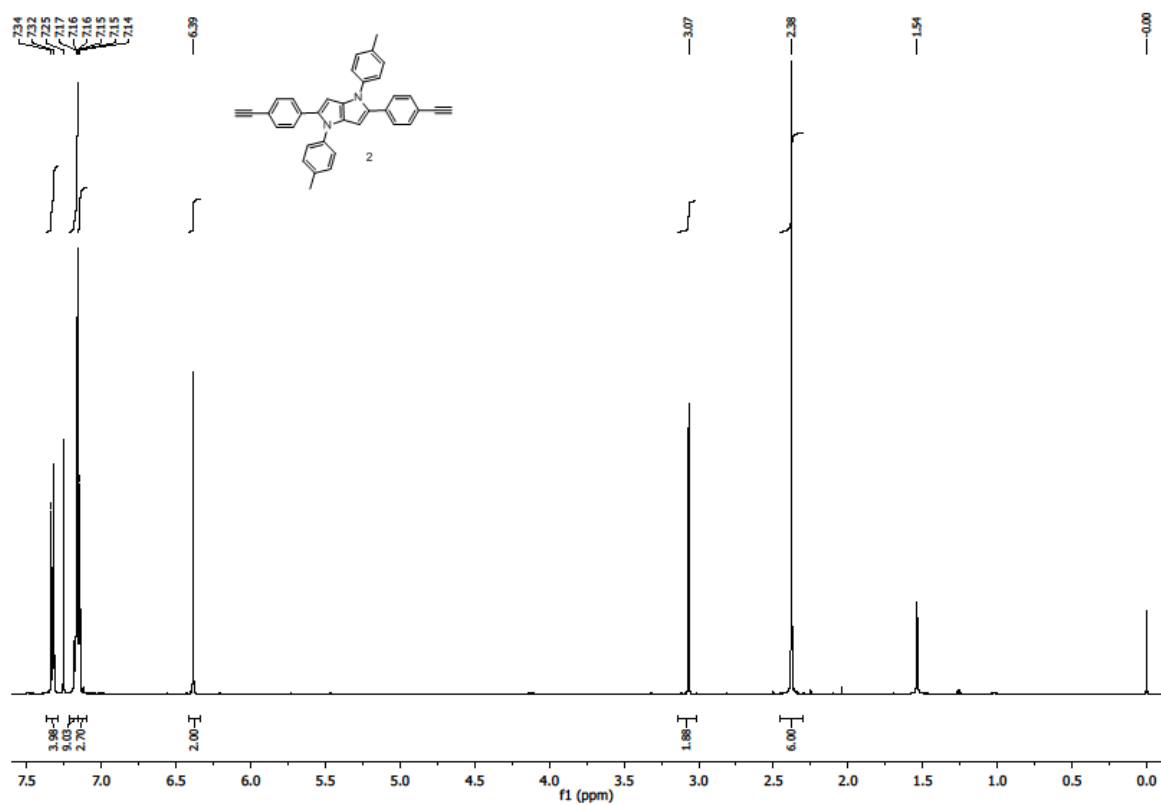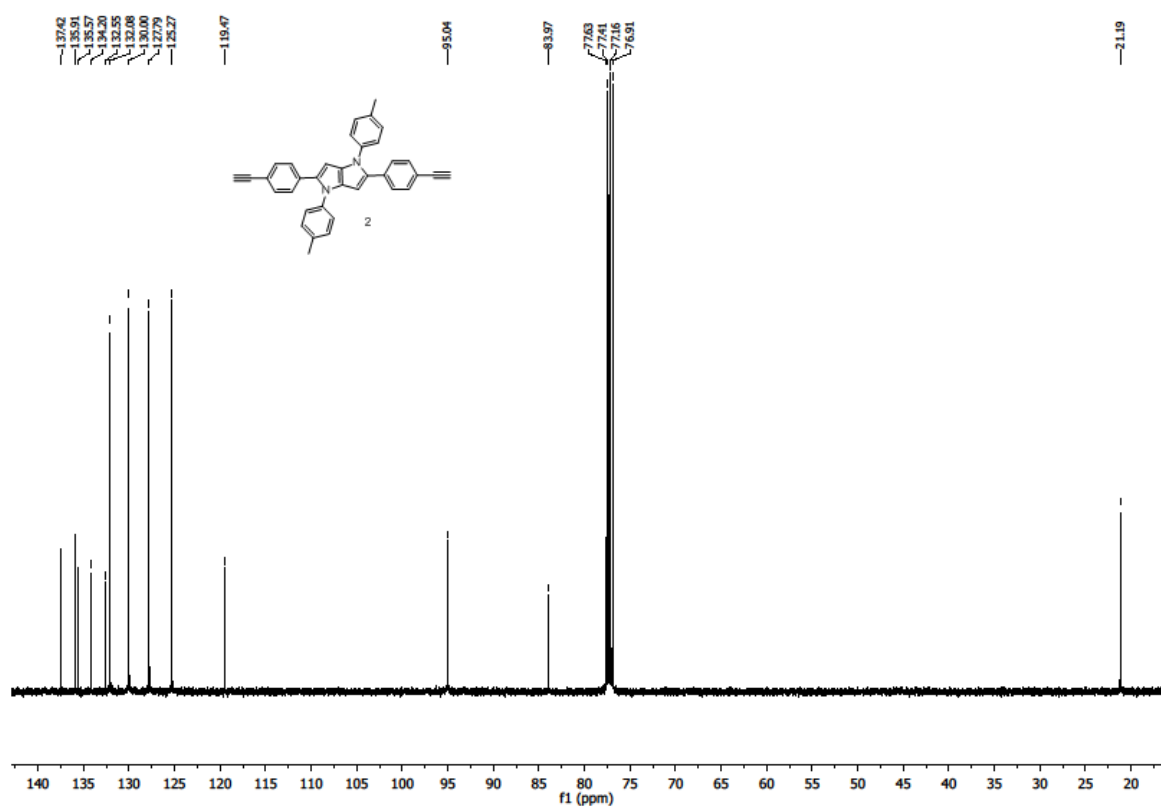



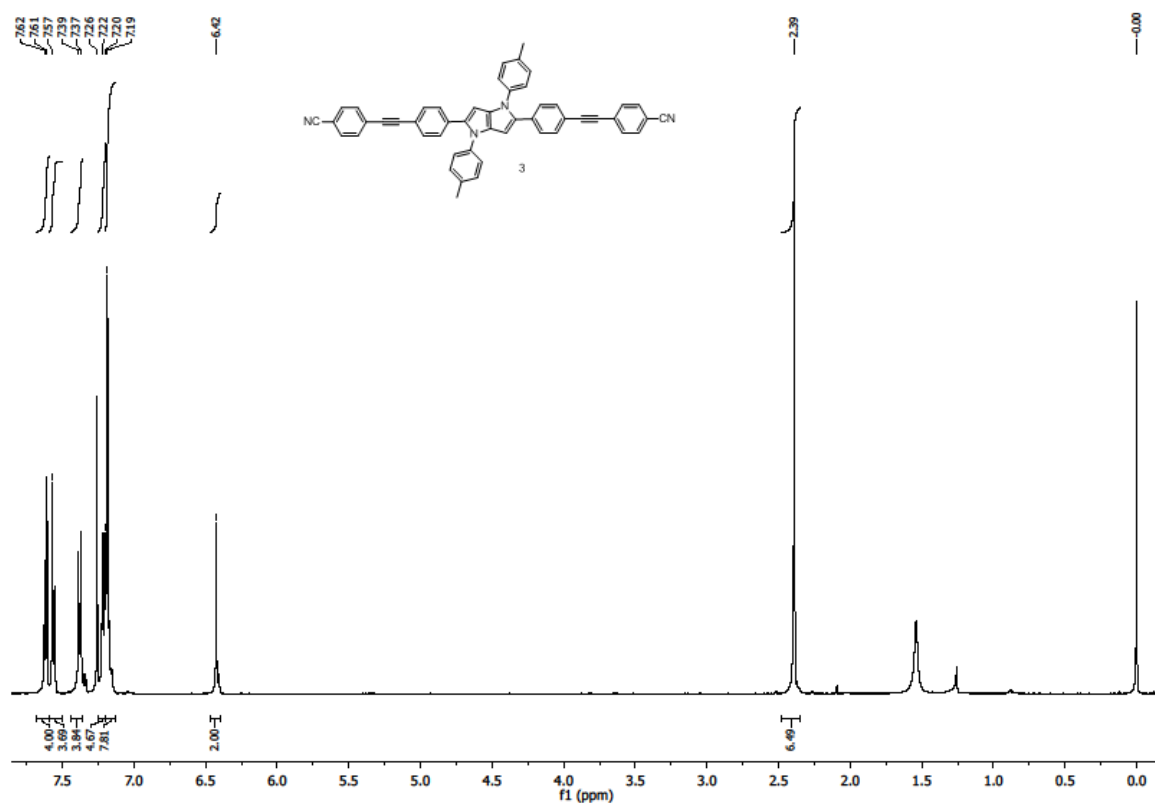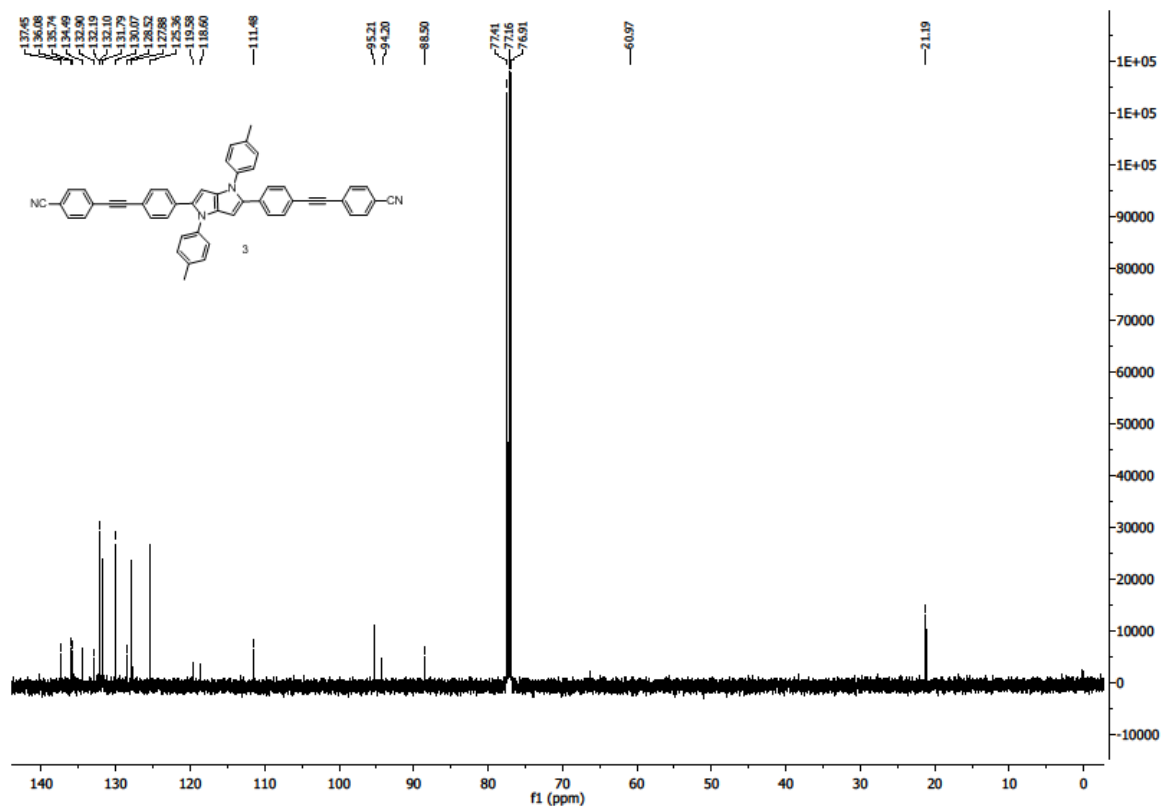



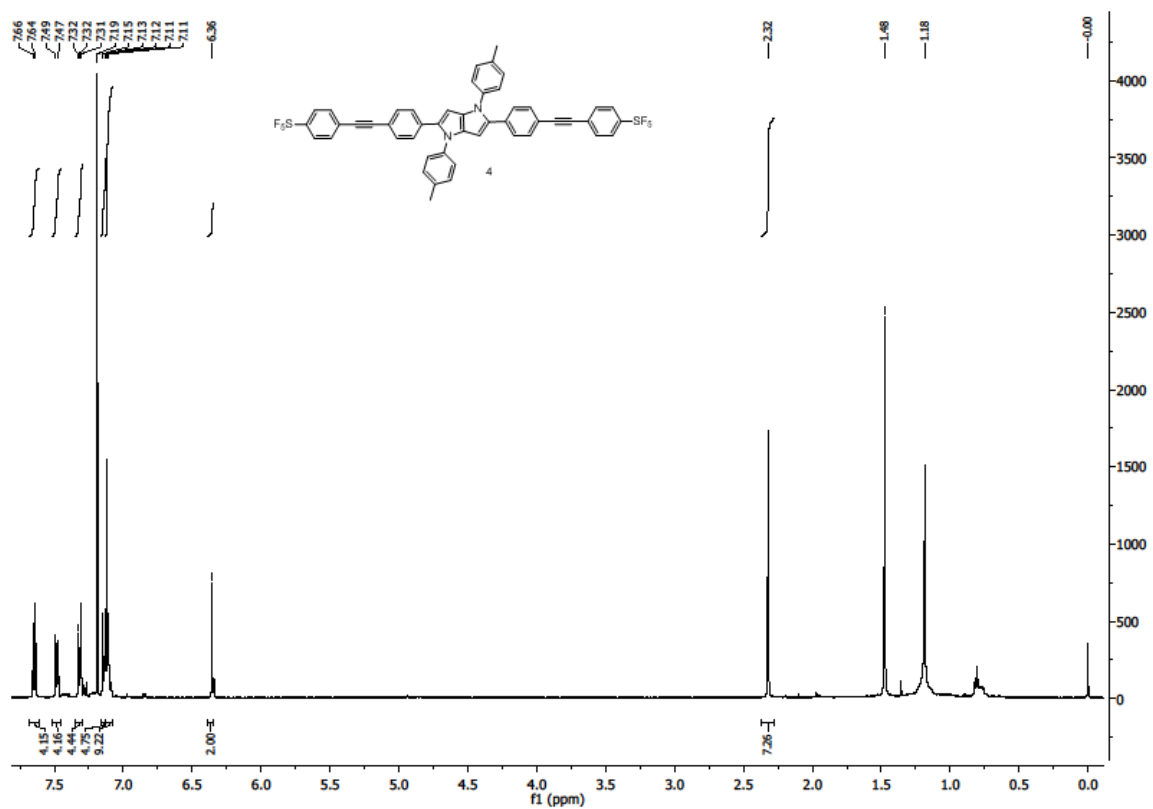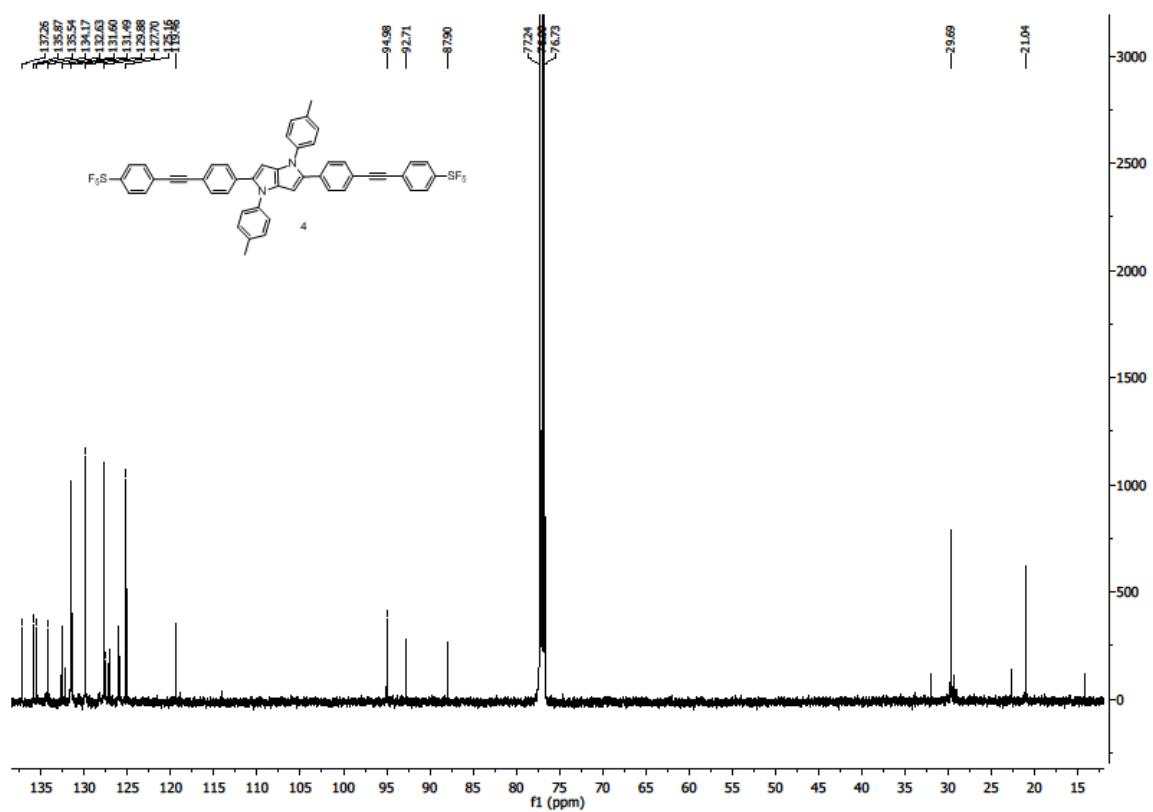



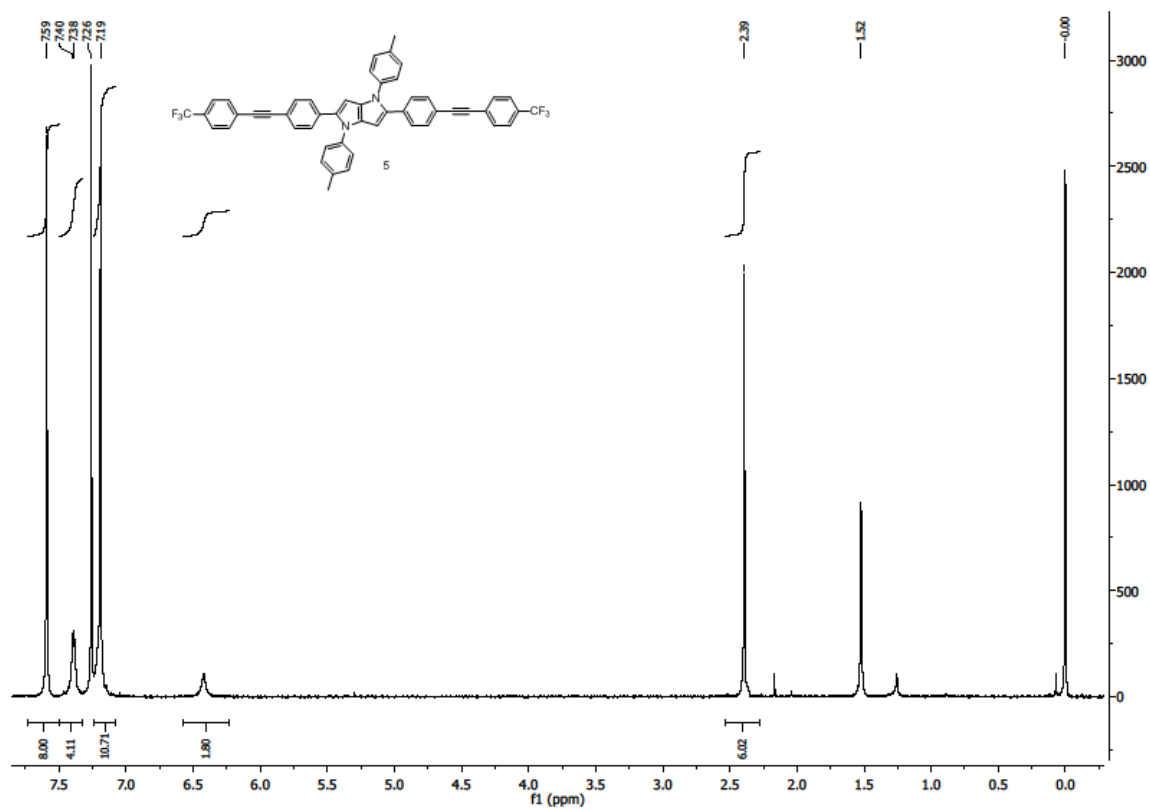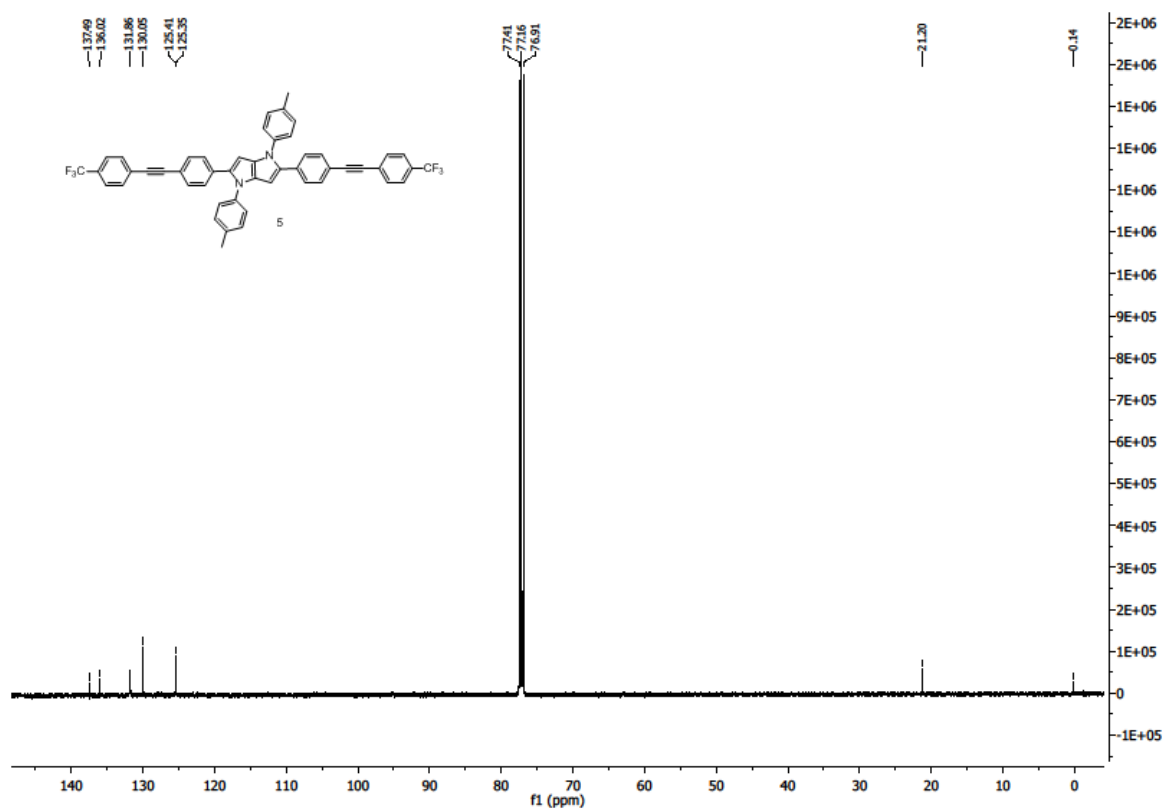



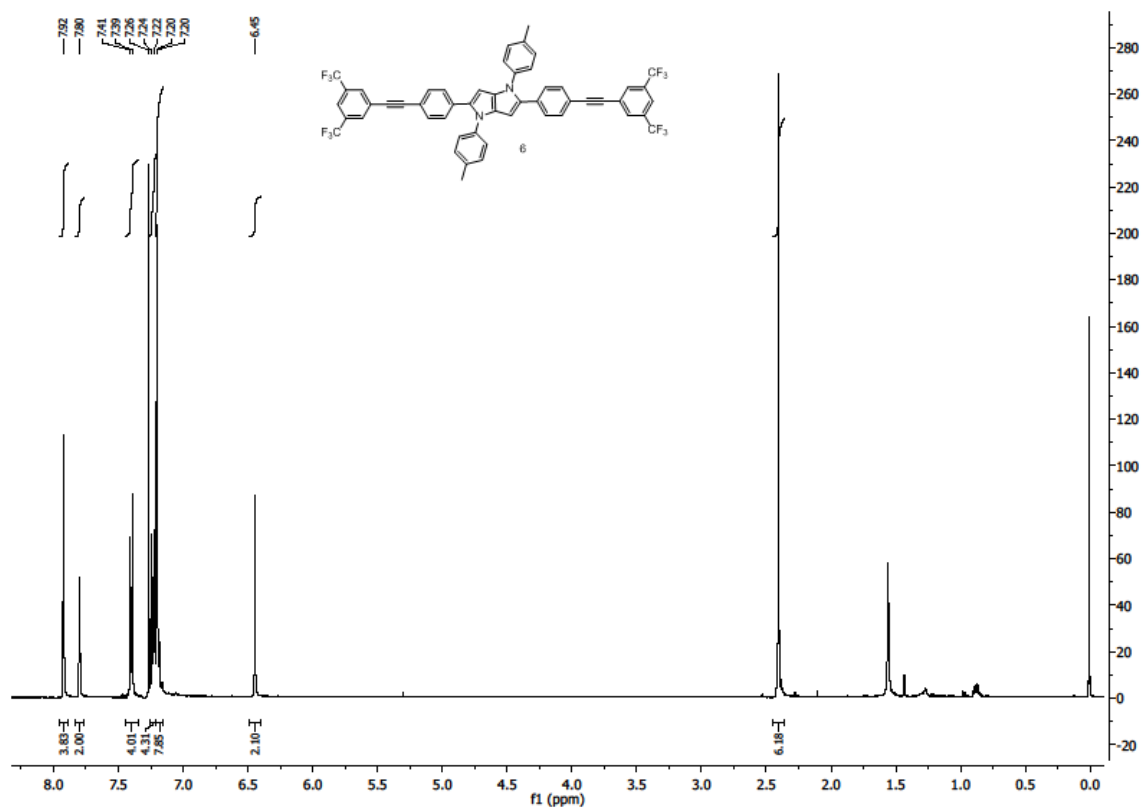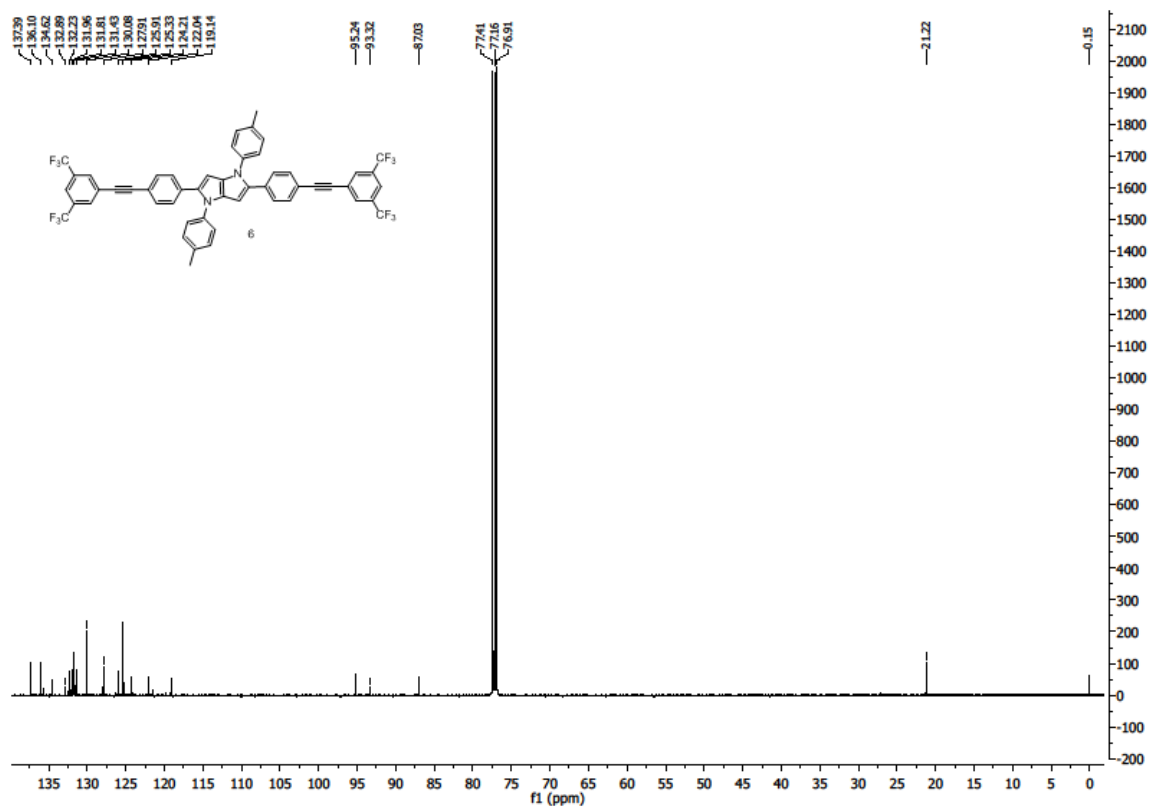



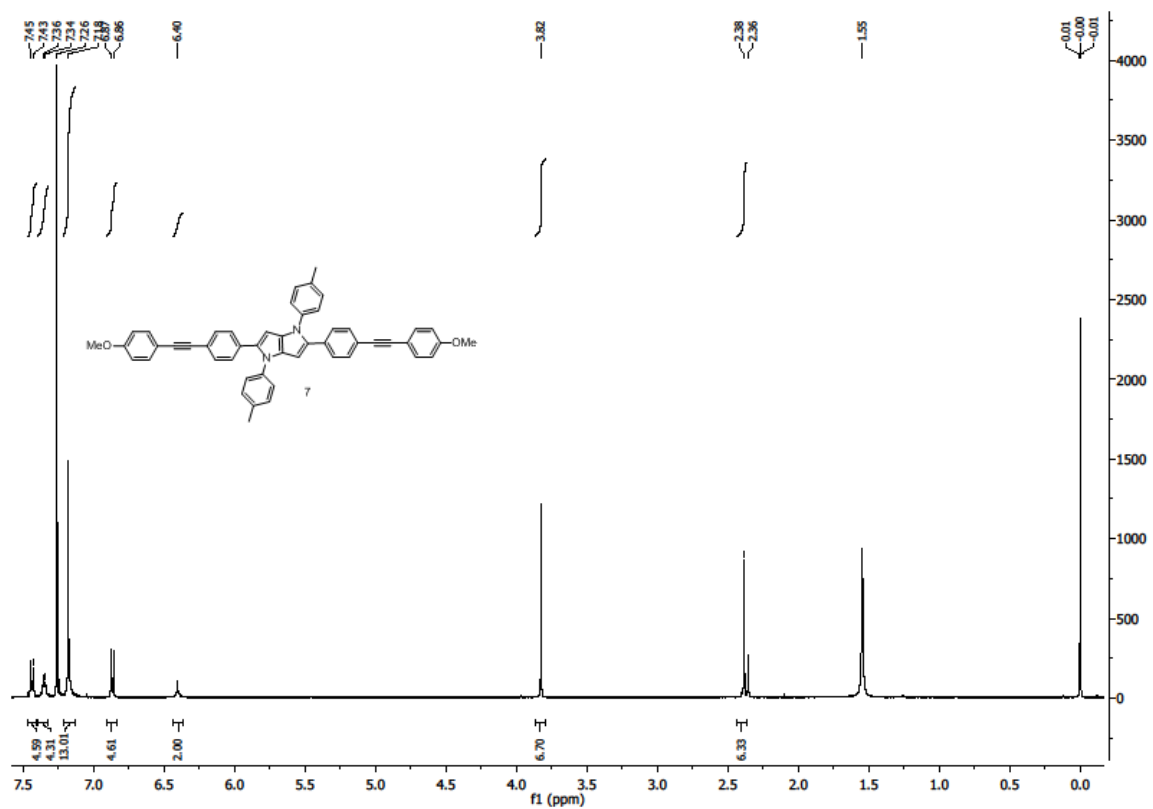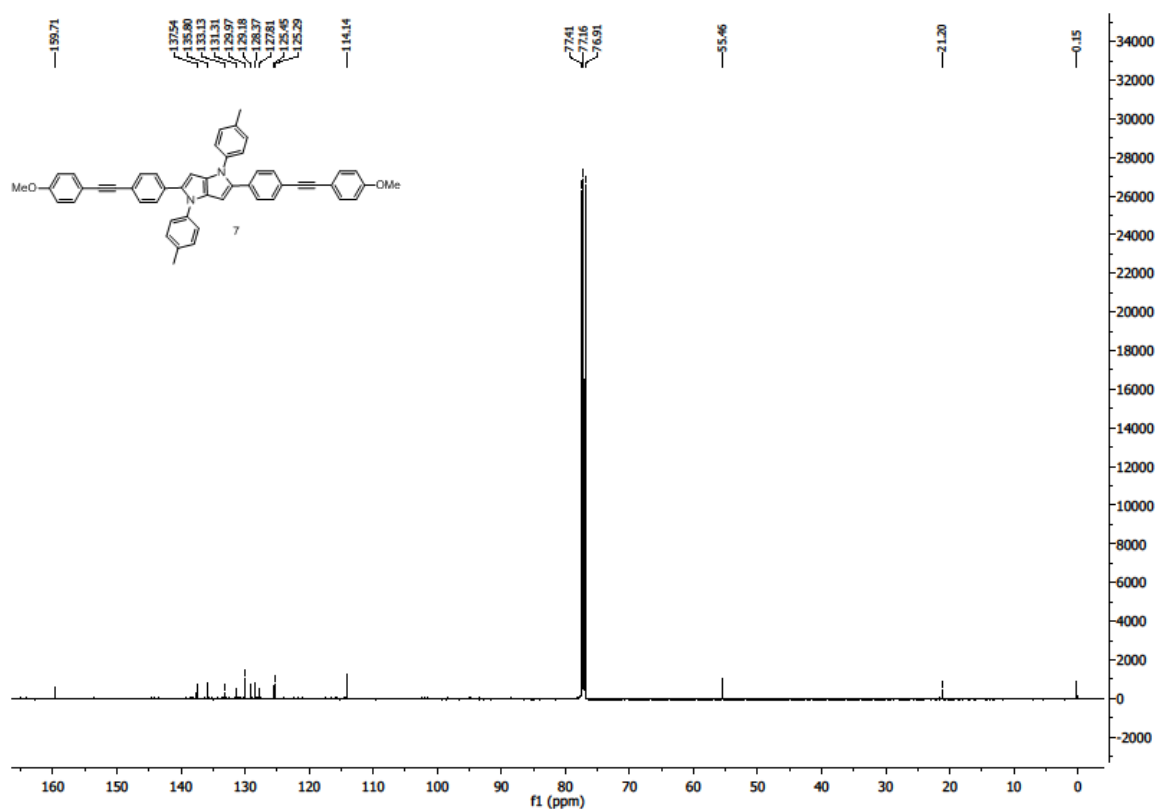



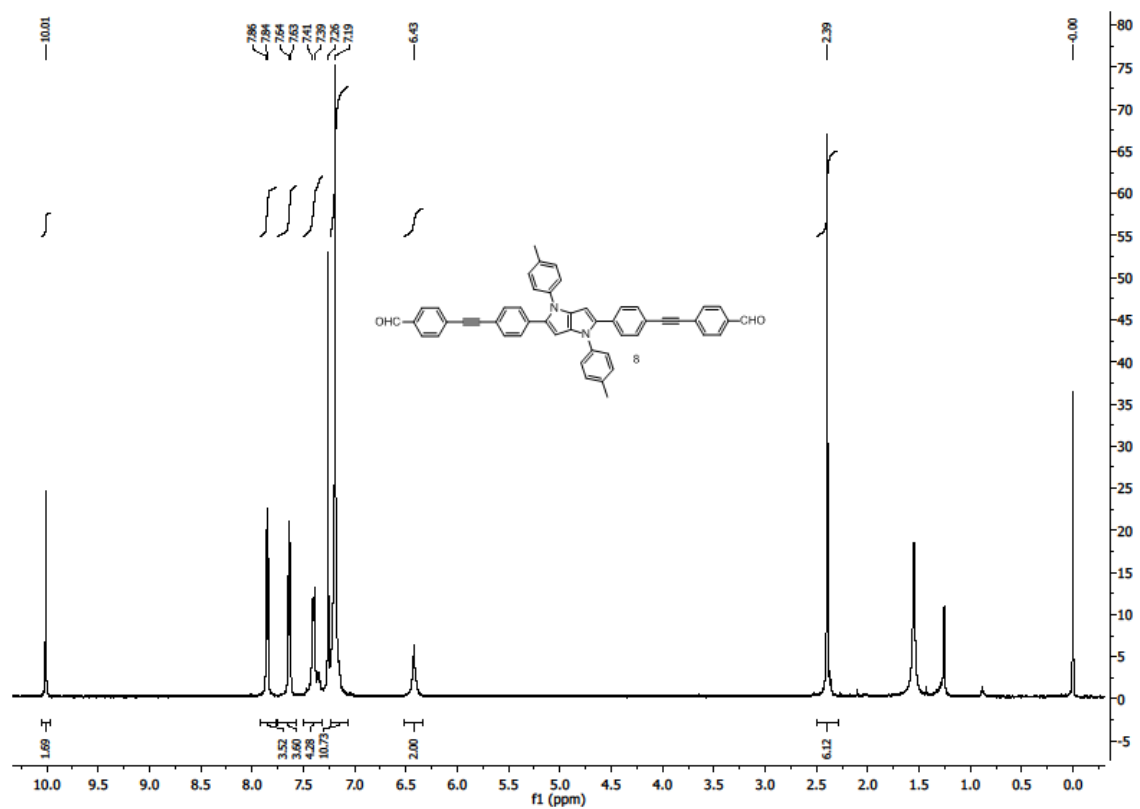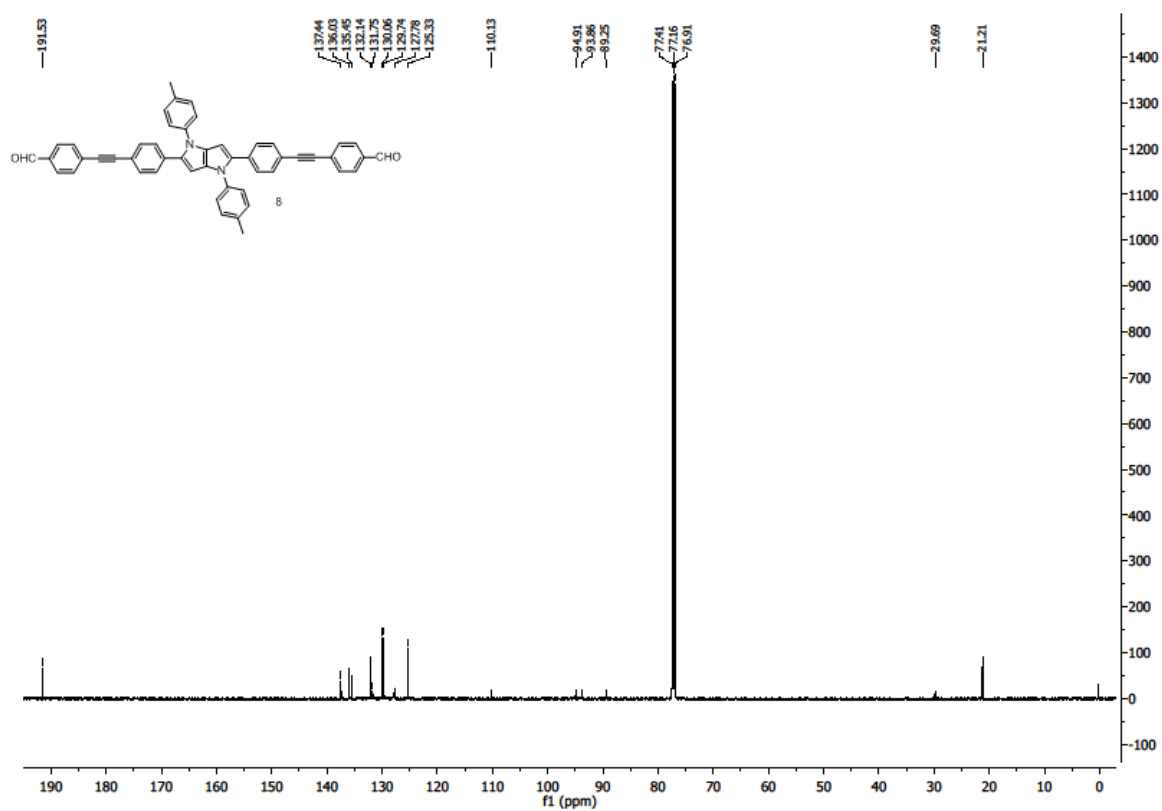

Supplement: c4ob00143e1.pdf [file c4ob00143e1.pdf]
